# Supplementary material for: Entropy, Uncertainty, and the Depth of Implicit Knowledge on Musical Creativity: Computational Study of Improvisation in Melody and Rhythm
Source: Front Comput Neurosci. 2018 Dec 19;12:97. doi: 10.3389/fncom.2018.00097 (PMC6305898; doi:10.3389/fncom.2018.00097)
Supplement: Supplementary file 1 [file Table_1.XLSX]

## Sheet: pitch seq. without rhythms
0th		1st		2nd
Phrase	TP	Phrase	TP	Phrase	TP
[-2]	0.138	[4,7]	0.288	[4,2,0]	0.487
[2]	0.107	[-10,-7]	0.286	[-4,-5,-7]	0.396
[-3]	0.105	[-4,-7]	0.262	[2,3,5]	0.392
[-1]	0.104	[-1,-3]	0.257	[1,5,8]	0.367
[1]	0.09	[-8,-5]	0.237	[5,3,0]	0.365
[3]	0.086	[5,3]	0.22	[-2,0,-2]	0.36
[0]	0.066	[2,3]	0.215	[1,3,5]	0.342
[-4]	0.064	[7,5]	0.209	[-3,-5,-7]	0.328
[4]	0.049	[9,5]	0.209	[-4,-2,0]	0.328
[5]	0.043	[1,3]	0.208	[-2,-3,-5]	0.321
[-5]	0.035	[10,7]	0.203	[-2,2,0]	0.304
[7]	0.019	[-1,-2]	0.194	[-3,-7,-10]	0.299
[-7]	0.016	[3,0]	0.189	[-3,2,0]	0.291
[9]	0.011	[1,0]	0.184	[-1,-2,-3]	0.29
[8]	0.008	[2,0]	0.184	[2,-3,0]	0.288
[6]	0.008	[-2,-4]	0.181	[-5,-1,2]	0.286
[-6]	0.007	[4,2]	0.181	[2,4,5]	0.281
[-8]	0.006	[2,4]	0.18	[1,0,-2]	0.273
[-9]	0.006	[0,0]	0.178	[2,-2,-5]	0.272
[10]	0.006	[-2,-3]	0.172	[-2,3,1]	0.272
3rd		4th		5th
Phrase	TP	Phrase	TP	Phrase	TP
[2,4,5,7]	0.401	[1,3,1,0,-2]	0.31	[2,4,6,7,9,11]	0.27
[3,7,5,3]	0.377	[1,3,5,6,8]	0.299	[2,3,5,7,9,10]	0.267
[1,5,8,12]	0.367	[-1,-3,-5,-6,-8]	0.298	[3,0,1,5,8,12]	0.252
[-2,-4,-5,-7]	0.363	[2,4,5,7,9]	0.297	[-2,-3,-5,-7,-8,-10]	0.238
[1,3,4,6]	0.349	[3,0,1,5,8]	0.286	[4,7,4,5,9,12]	0.238
[2,3,5,7]	0.345	[-3,-2,2,5,9]	0.284	[1,3,1,0,-2,-3]	0.222
[1,3,1,0]	0.341	[1,3,5,7,8]	0.278	[-2,-3,-5,-6,-7,-8]	0.214
[-3,-2,2,5]	0.321	[2,4,6,7,9]	0.254	[2,3,5,7,8,10]	0.209
[-2,-4,-2,-4]	0.32	[-1,-3,-4,-5,-6]	0.254	[1,3,5,7,8,10]	0.206
[-3,2,0,-3]	0.316	[-1,-2,-5,-9,-12]	0.243	[-1,-2,-4,-5,-7,-8]	0.19
[-1,-3,-1,-3]	0.313	[-1,0,4,7,11]	0.238	[-2,-3,-4,-5,-6,-7]	0.19
[-4,-7,-2,-5]	0.31	[-2,3,1,0,-2]	0.238	[-4,-2,0,1,3,5]	0.19
[3,2,1,0]	0.31	[-4,-3,-1,0,2]	0.238	[1,-3,-2,0,1,3]	0.19
[-2,-3,-4,-5]	0.309	[2,3,2,3,5]	0.238	[2,3,5,3,2,0]	0.19
[2,4,6,7]	0.306	[2,3,5,3,2]	0.238	[2,4,5,7,9,10]	0.17
[4,7,4,5]	0.297	[3,7,5,3,0]	0.238	[-1,-3,-5,-6,-8,-9]	0.167
[3,5,3,0]	0.294	[-3,-2,0,1,3]	0.231	[-1,0,2,3,5,6]	0.167
[-1,0,2,3]	0.286	[-2,-3,-5,-7,-8]	0.23	[-2,-4,-7,-2,-4,-7]	0.167
[-1,-3,-5,-6]	0.279	[3,7,10,7,8]	0.23	[1,2,3,2,1,0]	0.159
[2,4,2,0]	0.277	[-2,-4,0,-2,-4]	0.214	[1,2,1,0,-1,-2]	0.152

## Sheet: rhythm seq. without pitches
0th		1st		2nd
Phrase	TP	Phrase	TP	Phrase	TP
[1]	0.593	[1,1]	0.725	[1,1,1]	0.774
[2]	0.079	[0.25,0.25]	0.719	[0.33,0.33,0.33]	0.754
[0.5]	0.072	[0.167,0.167]	0.657	[0.2,0.2,0.2]	0.675
[3]	0.026	[0.33,0.33]	0.61	[1,0.5,0.5]	0.663
[1.5]	0.025	[0.67,0.67]	0.6	[0.67,0.67,0.67]	0.643
[0.33]	0.023	[0.5,0.5]	0.575	[3,1,1]	0.62
[0.67]	0.022	[0.2,0.2]	0.565	[4,1,1]	0.613
[0.25]	0.014	[0.1,0.1]	0.556	[1.33,1.33,1.33]	0.597
[4]	0.011	[0.111,0.111]	0.552	[1,0.67,0.67]	0.595
[1.33]	0.009	[1.33,1.33]	0.51	[2,1,1]	0.58
[0.2]	0.009	[0.4,0.4]	0.508	[0.25,0.25,0.25]	0.574
[5]	0.005	[2,1]	0.504	[0.5,1,0.5]	0.555
[0.167]	0.005	[0.125,0.125]	0.504	[1,1.33,1.33]	0.531
[0.75]	0.005	[4,1]	0.491	[6,1,1]	0.524
[0.4]	0.005	[3,1]	0.445	[1.5,1.5,1.5]	0.512
[6]	0.004	[0.75,0.75]	0.433	[0.5,0.5,0.5]	0.511
[0.143]	0.004	[0.143,0.143]	0.429	[5,1,1]	0.492
[2.5]	0.004	[1.5,1.5]	0.424	[1,3,1]	0.491
[8]	0.004	[7,1]	0.417	[0.111,0.111,0.111]	0.484
[7]	0.004	[5,1]	0.409	[1,4,1]	0.484
3rd		4th		5th
Phrase	TP	Phrase	TP	Phrase	TP
[1,1,1,1]	0.816	[1,1,1,1,1]	0.835	[1,1,1,1,1,1]	0.838
[0.5,0.5,0.5,0.5]	0.731	[2,1,1,1,1]	0.789	[2,1,1,1,1,1]	0.79
[1,2,1,1]	0.731	[1,0.5,0.5,0.5,0.5]	0.694	[0.5,0.5,0.5,0.5,0.5,0.5]	0.789
[3,1,1,1]	0.721	[0.5,0.5,0.5,0.5,0.5]	0.682	[1,2,1,1,1,1]	0.763
[0.25,0.25,0.25,0.25]	0.686	[3,1,1,1,1]	0.671	[1,1,1,2,1,1]	0.697
[1,3,1,1]	0.663	[1,1,2,1,1]	0.67	[1,1,2,1,1,1]	0.66
[1,1,0.5,0.5]	0.661	[1,3,1,1,1]	0.64	[1,1,3,1,1,1]	0.635
[1,0.67,0.67,0.67]	0.65	[1,1,3,1,1]	0.619	[1,1,1,1,2,1]	0.63
[2,2,1,1]	0.609	[1,2,2,1,1]	0.599	[0.33,0.33,0.33,0.33,0.33,0.33]	0.615
[4,1,1,1]	0.599	[1,2,1,1,1]	0.596	[2,2,2,2,2,2]	0.598
[2,1,2,1]	0.586	[1,1,1,2,1]	0.586	[1,3,1,1,1,1]	0.591
[2,1,1,1]	0.571	[1,1,1,0.5,0.5]	0.581	[3,1,1,1,1,1]	0.579
[1,1.33,1.33,1.33]	0.57	[0.33,0.33,0.33,0.33,0.33]	0.566	[0.25,0.25,0.25,0.25,0.25,0.25]	0.548
[1,1,0.67,0.67]	0.566	[1,1,1,0.67,0.67]	0.563	[1,1,1,3,1,1]	0.54
[1,1,1.5,1.5]	0.552	[1,1,0.67,0.67,0.67]	0.562	[1,1.5,1.5,1.5,1.5,1.5]	0.537
[1,1.5,1.5,1.5]	0.54	[1,0.5,0.5,1,1]	0.548	[1,1,1.5,1.5,1.5,1.5]	0.517
[1,4,1,1]	0.528	[1,1,1.5,1.5,1.5]	0.543	[1,1,1,0.67,0.67,0.67]	0.514
[1.5,1.5,1.5,1.5]	0.519	[0.5,0.5,1,0.5,0.5]	0.54	[1,1,1,1,0.67,0.67]	0.514
[0.33,0.33,0.33,0.33]	0.517	[1.5,1.5,1.5,1.5,1.5]	0.537	[1,1,1,1,0.5,0.5]	0.512
[1,1,2,1]	0.513	[4,1,1,1,1]	0.53	[0.67,0.67,0.67,0.67,0.67,0.67]	0.508

## Sheet: pitch seq. with rhythms
0th		1st		2nd
Phrase	TP	Phrase	TP	Phrase	TP
[0 with 1]	0.167	[-1,-3 with 1]	0.324	[2,3,5 with 1,1]	0.453
[2 with 0.25]	0.166	[4,7 with 1]	0.318	[4,2,0 with 1,1]	0.452
[0 with 4]	0.163	[-4,-7 with 0.33]	0.31	[-4,-5,-7 with 1,1]	0.435
[0 with 1.25]	0.151	[-4,-7 with 1]	0.292	[-2,-3,-5 with 1,1]	0.382
[0 with 2]	0.149	[3,0 with 0.5]	0.29	[2,4,5 with 1,1]	0.353
[-2 with 2.5]	0.146	[4,2 with 2]	0.284	[1,5,8 with 1,1]	0.348
[0 with 2.5]	0.146	[4,7 with 0.5]	0.278	[5,3,0 with 1,1]	0.338
[-5 with 3.33]	0.143	[-8,-5 with 1]	0.275	[-3,-5,-7 with 1,1]	0.325
[2 with 1.5]	0.137	[1,3 with 1]	0.273	[1,3,5 with 1,1]	0.29
[-1 with 0.17]	0.134	[7,4 with 1]	0.253	[-2,3,1 with 1,1]	0.29
[-3 with 0.75]	0.13	[2,3 with 1]	0.252	[-4,-2,0 with 1,1]	0.285
[-2 with 0.25]	0.129	[2,0 with 0.5]	0.249	[1,0,-2 with 1,1]	0.281
[-1 with 0.33]	0.128	[-2,0 with 0.2]	0.238	[-2,-4,-7 with 1,1]	0.279
[3 with 1.5]	0.127	[-3,-2 with 1.5]	0.23	[3,0,1 with 1,1]	0.279
[-2 with 1]	0.125	[-1,-2 with 1]	0.229	[0,0,0 with 1,1]	0.274
[-2 with 0.17]	0.125	[2,4 with 1]	0.227	[-1,-2,-3 with 1,1]	0.271
[-3 with 0.25]	0.123	[-2,-3 with 1]	0.226	[-3,-7,-10 with 1,1]	0.271
[0 with 0.67]	0.123	[5,3 with 1]	0.218	[-1,-2,-3 with 0.5,0.5]	0.27
[-3 with 0.5]	0.122	[0,0 with 1]	0.214	[-1,-4,-8 with 1,1]	0.267
[-2 with 0.58]	0.119	[1,0 with 2]	0.213	[1,3,4 with 1,1]	0.265
3rd		4th		5th
Phrase	TP	Phrase	TP	Phrase	TP
[2,4,5,7 with 1,1,1]	0.411	[2,4,5,7,9 with 1,1,1,1]	0.303	[3,0,1,5,8,12 with 1,1,1,1,1]	0.214
[-2,-3,-5,-6 with 1,1,1]	0.348	[-1,-3,-5,-6,-8 with 1,1,1,1]	0.274	[-1,-2,-4,-5,-7,-8 with 1,1,1,1,1]	0.19
[1,5,8,12 with 1,1,1]	0.347	[-1,-3,-4,-6,-7 with 1,1,1,1]	0.262	[-2,-3,-4,-5,-6,-7 with 1,1,1,1,1]	0.19
[1,3,4,6 with 1,1,1]	0.329	[-1,-3,-4,-5,-6 with 1,1,1,1]	0.246	[2,3,5,7,9,10 with 1,1,1,1,1]	0.19
[-4,-7,-2,-5 with 1,1,1]	0.31	[1,3,4,6,7 with 1,1,1,1]	0.244	[1,3,5,6,8,10 with 1,1,1,1,1]	0.175
[-2,-4,-5,-7 with 1,1,1]	0.303	[3,0,1,5,8 with 1,1,1,1]	0.238	[-2,-4,-7,-2,-4,-7 with 1,1,1,1,1]	0.167
[2,3,5,7 with 1,1,1]	0.287	[-3,-2,2,5,9 with 1,1,1,1]	0.222	[1,3,5,7,8,10 with 1,1,1,1,1]	0.167
[3,7,5,3 with 1,1,1]	0.286	[1,3,5,6,8 with 1,1,1,1]	0.218	[2,3,5,7,8,10 with 1,1,1,1,1]	0.156
[-3,-2,2,5 with 1,1,1]	0.27	[1,3,5,7,8 with 1,1,1,1]	0.214	[-1,-3,-4,-3,-1,0 with 1,1,1,1,1]	0.143
[-2,-3,-4,-5 with 1,1,1]	0.266	[-1,-2,-3,-4,-5 with 1,1,1,1]	0.197	[-1,-3,-5,-7,-8,-10 with 1,1,1,1,1]	0.143
[4,2,0,-3 with 1,1,1]	0.26	[-2,-3,-4,-5,-6 with 1,1,1,1]	0.19	[-2,-3,-5,-7,-8,-10 with 1,1,1,1,1]	0.143
[-2,-3,-2,2 with 1,1,1]	0.25	[-4,-7,-2,-5,-4 with 1,1,1,1]	0.19	[-2,-3,-5,-7,-9,-10 with 1,1,1,1,1]	0.143
[2,3,5,6 with 1,1,1]	0.244	[3,7,5,3,0 with 1,1,1,1]	0.19	[-2,-4,-6,-7,-9,-11 with 1,1,1,1,1]	0.143
[-3,-2,0,1 with 1,1,1]	0.239	[1,3,4,6,8 with 1,1,1,1]	0.185	[-2,-5,-9,-7,-5,-9 with 1,1,1,1,1]	0.143
[-3,-5,-7,-5 with 1,1,1]	0.238	[-3,-2,0,1,3 with 1,1,1,1]	0.183	[-4,-7,-2,-5,-4,-2 with 1,1,1,1,1]	0.143
[2,5,2,3 with 1,1,1]	0.238	[-1,-2,-5,-9,-12 with 1,1,1,1]	0.179	[2,4,6,7,9,11 with 1,1,1,1,1]	0.143
[-1,-2,-3,-4 with 1,1,1]	0.234	[-1,-3,-5,-7,-8 with 1,1,1,1]	0.167	[-1,-3,-4,-5,-6,-7 with 1,1,1,1,1]	0.119
[4,7,4,5 with 1,1,1]	0.23	[-2,-4,0,-2,-4 with 1,1,1,1]	0.167	[-1,-3,-4,-5,-6,-8 with 1,1,1,1,1]	0.119
[-1,-3,2,0 with 1,1,1]	0.222	[-2,-5,0,-2,-5 with 1,1,1,1]	0.167	[-2,-3,-5,-6,-7,-8 with 1,1,1,1,1]	0.119
[-1,-3,-5,-6 with 1,1,1]	0.221	[2,4,6,7,9 with 1,1,1,1]	0.167	[-2,-5,0,-2,-5,-8 with 1,1,1,1,1]	0.119

## Sheet: rhythm seq. with pitches
0th		1st		2nd
Phrase	TP	Phrase	TP	Phrase	TP
[1 with 2,4]	0.825	[1,1 with 2,4,5]	0.693	[1,1,1 with -2,-3,-5,-6]	0.524
[1 with 3,7]	0.779	[1,1 with -2,-3,-5]	0.656	[1,1,1 with 2,3,5,7]	0.458
[1 with -3,-6]	0.76	[1,1 with -2,-4,-5]	0.655	[1,1,1 with 1,3,4,6]	0.448
[1 with 2,3]	0.76	[1,1 with -2,-4,-7]	0.643	[1,1,1 with 2,4,5,7]	0.431
[1 with -2,-3]	0.751	[1,1 with 2,3,5]	0.636	[1,1,1 with -2,-4,-5,-7]	0.429
[1 with -2,-4]	0.72	[1,1 with -3,-5,-7]	0.586	[1,1,1 with 2,3,5,6]	0.423
[1 with -1,-3]	0.716	[1,1 with -1,-3,-4]	0.56	[1,1,1 with 1,5,8,12]	0.389
[1 with -4,-5]	0.674	[1,1 with -3,-7,-10]	0.56	[1,1,1 with -1,-2,-3,-4]	0.387
[1 with 3,5]	0.671	[1,1 with 1,3,4]	0.555	[1,1,1 with -1,-3,-4,-5]	0.333
[1 with -4,-7]	0.671	[1,1 with -1,-3,-5]	0.538	[1,1,1 with -1,-3,-5,-6]	0.333
[1 with 4,7]	0.651	[1,1 with 1,3,5]	0.535	[1,1,1 with -3,-2,0,1]	0.333
[1 with -3,-5]	0.634	[1,1 with -4,-5,-7]	0.527	[1,1,1 with -4,-7,-2,-5]	0.333
[1 with -2,-5]	0.634	[1,1 with -3,-2,0]	0.524	[1,1,1 with -1,-2,-3,-5]	0.332
[1 with 5,3]	0.629	[1,1 with -4,-7,-2]	0.524	[1,1,1 with 1,3,5,6]	0.302
[1 with 1,3]	0.624	[1,1 with 3,7,10]	0.51	[1,1,1 with -1,-3,-4,-6]	0.302
[1 with 3,2]	0.618	[1,1 with -2,-5,-7]	0.496	[1,1,1 with -1,-2,-4,-5]	0.286
[1 with -3,2]	0.618	[1,1 with -2,-5,-9]	0.492	[1,1,1 with -2,-3,-2,2]	0.286
[1 with -3,-7]	0.616	[1,1 with 4,7,11]	0.492	[1,1,1 with -2,-3,-4,-5]	0.286
[1 with -1,-2]	0.613	[1,1 with -2,-3,-2]	0.483	[1,1,1 with -2,-4,-7,-9]	0.286
[1 with -2,-7]	0.61	[1,1 with -1,-2,-3]	0.475	[1,1,1 with -3,-2,2,5]	0.286
3rd		4th		5th
Phrase	TP	Phrase	TP	Phrase	TP
[1,1,1,1 with 2,4,5,7,9]	0.324	[1,1,1,1,1 with 3,0,1,5,8,12]	0.214	[1,1,1,1,1,1 with -1,-3,-5,-7,-8,-10,-12]	0.143
[1,1,1,1 with -1,-2,-3,-4,-5]	0.302	[1,1,1,1,1 with -1,-2,-4,-5,-7,-8]	0.19	[1,1,1,1,1,1 with -2,-4,-7,-2,-4,-7,-10]	0.143
[1,1,1,1 with -1,-3,-4,-6,-7]	0.286	[1,1,1,1,1 with -2,-3,-4,-5,-6,-7]	0.19	[1,1,1,1,1,1 with 1,3,5,7,8,10,12]	0.143
[1,1,1,1 with -1,-3,-5,-6,-8]	0.286	[1,1,1,1,1 with -2,-4,-7,-2,-4,-7]	0.19	[1,1,1,1,1,1 with 2,3,5,7,8,10,12]	0.143
[1,1,1,1 with 1,3,4,6,8]	0.286	[1,1,1,1,1 with 1,3,5,6,8,10]	0.19	[1,1,1,1,1,1 with 2,4,5,7,9,10,12]	0.127
[1,1,1,1 with 2,3,5,7,9]	0.286	[1,1,1,1,1 with 2,4,5,7,9,10]	0.179	[1,1,1,1,1,1 with -1,-2,-3,-4,-5,-6,-7]	0.095
[1,1,1,1 with 1,3,4,6,7]	0.28	[1,1,1,1,1 with 2,3,5,7,8,10]	0.175	[1,1,3,3,3,3 with -1,-2,-3,-4,-5,-6,-7]	0.095
[1,1,1,1 with -3,-2,2,5,9]	0.254	[1,1,1,1,1 with 1,3,5,7,8,10]	0.167	[1,1,1,1,1,1 with -1,-2,-3,-4,-7,-11,-14]	0.095
[1,1,1,1 with 1,3,5,6,8]	0.25	[1,1,1,1,1 with 2,3,5,7,9,10]	0.167	[1,1,1,1,1,1 with -1,-2,-3,-5,-6,-8,-9]	0.095
[1,1,1,1 with -1,-2,-4,-5,-7]	0.238	[1,1,1,1,1 with -1,-2,-3,-4,-5,-6]	0.143	[1,1,1,1,1,1 with -1,-2,-3,-6,-10,-13,-8]	0.095
[1,1,1,1 with -1,-3,-4,-5,-6]	0.238	[1,1,1,1,1 with -1,-2,-5,-9,-12,-7]	0.143	[1,1,1,1,1,1 with -1,-2,-5,-9,-12,-7,-10]	0.095
[1,1,1,1 with -2,-3,-4,-5,-6]	0.238	[1,1,1,1,1 with -1,-3,-4,-3,-1,0]	0.143	[1,1,1,1,1,1 with -1,-3,-4,-3,-1,0,1]	0.095
[1,1,1,1 with 1,5,8,12,15]	0.238	[1,1,1,1,1 with -1,-3,-4,-5,-6,-7]	0.143	[1,1,1,1,1,1 with -1,-3,-4,-5,-6,-7,-8]	0.095
[1,1,1,1 with 3,0,1,5,8]	0.238	[1,1,1,1,1 with -1,-3,-4,-5,-6,-8]	0.143	[1,1,1,1,1,1 with -1,-3,-4,-6,-7,-10,-11]	0.095
[1,1,1,1 with 2,3,5,7,8]	0.229	[1,1,1,1,1 with -1,-3,-4,-6,-7,-8]	0.143	[1,1,1,1,1,1 with -1,-3,-4,-6,-7,-8,-9]	0.095
[1,1,1,1 with 1,3,5,7,8]	0.214	[1,1,1,1,1 with -1,-3,-5,-6,-8,-9]	0.143	[1,1,1,1,1,1 with -1,-4,-8,-11,-6,-9,-8]	0.095
[1,1,1,1 with [-1,-2,-5,-9,-12]	0.19	[1,1,1,1,1 with -1,-3,-5,-7,-8,-10]	0.143	[1,1,1,1,1,1 with -1,0,-3,-4,-3,-6,-7]	0.095
[1,1,1,1 with -1,-3,-5,-7,-8]	0.19	[1,1,1,1,1 with -2,-3,-5,-6,-7,-8]	0.143	[1,1,1,1,1,1 with -2,-3,-5,-6,-7,-8,-9]	0.095
[1,1,1,1 with -2,-3,-5,-6,-7]	0.19	[1,1,1,1,1 with -2,-3,-5,-7,-8,-10]	0.143	[1,1,1,1,1,1 with -2,-3,-5,-6,-8,-9,-10]	0.095
[1,1,1,1 with -2,-3,-5,-6,-8]	0.19	[1,1,1,1,1 with -2,-3,-5,-7,-9,-10]	0.143	[1,1,1,1,1,1 with -2,-3,-5,-7,-8,-10,-11]	0.095
